# Supplementary material for: A botulinum toxin A treatment algorithm for de novo management of torticollis and laterocollis
Source: PubMed Central journal article supplement — BMJ Open. 2011 Sep 12;1(2):e000196. doi: 10.1136/bmjopen-2011-000196 (PMC3191597; doi:10.1136/bmjopen-2011-000196), 2011-09-12
Supplement: bmjopen-2011-000196-s1.pdf [file bmjopen-2011-000196-s1.pdf]

## STROBE statement: Checklist of essential items Version 3 (Sept 2005)

|                               | <i>Item #</i> | <i>Cohort study</i>                                                                                                           | <i>Case-control study</i>                                                                                       | <i>Cross-sectional study</i>                                                                 |
|-------------------------------|---------------|-------------------------------------------------------------------------------------------------------------------------------|-----------------------------------------------------------------------------------------------------------------|----------------------------------------------------------------------------------------------|
| <b>TITLE &amp; ABSTRACT</b>   | 1             | (a) Identify the article as a cohort study in the title or the abstract.                                                      | (a) Identify the article as a case-control study in the title or the abstract.                                  | (a) Identify the article as a cross-sectional study in the title or the abstract.            |
|                               |               | (b) The abstract should be an informative and structured summary of the article, addressing key items in this checklist.      |                                                                                                                 |                                                                                              |
| <b>INTRODUCTION</b>           |               |                                                                                                                               |                                                                                                                 |                                                                                              |
| <b>Background / Rationale</b> | 2             | Explain scientific background and rationale for the investigation being reported.                                             |                                                                                                                 |                                                                                              |
| <b>Objectives</b>             | 3             | State specific objectives including any pre-specified hypotheses.                                                             |                                                                                                                 |                                                                                              |
| <b>METHODS</b>                |               |                                                                                                                               |                                                                                                                 |                                                                                              |
| <b>Study design</b>           | 4             | Present key elements of study design.<br>State purpose of original study, if article is one of several from an ongoing study. |                                                                                                                 |                                                                                              |
| <b>Setting</b>                | 5             | Describe setting, locations and dates defining periods of data collection.                                                    |                                                                                                                 |                                                                                              |
| <b>Participants</b>           | 6             | (a) Give inclusion and exclusion criteria, sources and methods of selection of participants.                                  | (a) For cases and controls separately, give inclusion and exclusion criteria, sources and methods of selection. | (a) Give inclusion and exclusion criteria, sources and methods of selection of participants. |
|                               |               | (b) Give period and methods of follow-up.                                                                                     | (b) Give precise diagnostic criteria for cases, and rationale for choice of controls.                           |                                                                                              |

|                               | <i>Item #</i> | <i>Cohort study</i>                                                                                                                                                  | <i>Case-control study</i>                                                            | <i>Cross-sectional study</i>                                         |
|-------------------------------|---------------|----------------------------------------------------------------------------------------------------------------------------------------------------------------------|--------------------------------------------------------------------------------------|----------------------------------------------------------------------|
|                               |               |                                                                                                                                                                      | (c) For matched studies, give matching criteria and number of controls per case.     |                                                                      |
| <b>Variables of interest</b>  | 7             | List and clearly define all variables of interest indicating which are seen as outcomes, exposures, potential predictors, potential confounders or effect modifiers. |                                                                                      |                                                                      |
| <b>Measurement</b>            | 8 *           | (a) For each variable of interest give details of methods of assessment (measurement).                                                                               |                                                                                      |                                                                      |
|                               |               | (b) If applicable, describe comparability of assessment methods across groups.                                                                                       |                                                                                      |                                                                      |
| <b>Bias</b>                   | 9             | Describe any measures taken to address potential sources of bias.                                                                                                    |                                                                                      |                                                                      |
| <b>Sample size</b>            | 10            | Describe rationale for study size, including practical and statistical considerations.                                                                               |                                                                                      |                                                                      |
| <b>Statistical methods</b>    | 11            | (a) Describe all statistical methods including those to control for confounding.                                                                                     |                                                                                      |                                                                      |
|                               |               | (b) Describe how loss to follow-up and missing data were addressed.                                                                                                  | (b) Describe how any matching of cases and controls and missing data were addressed. | (b) Describe how any design effects and missing data were addressed. |
|                               |               | (c) If applicable, describe methods for subgroup analyses and sensitivity analyses.                                                                                  |                                                                                      |                                                                      |
| <b>Quantitative variables</b> | 12            | (a) Explain how quantitative variables are analyzed e.g. which groupings are chosen, and why.                                                                        |                                                                                      |                                                                      |
|                               |               | (b) Present results from continuous analyses as well as from grouped analyses, if appropriate.                                                                       |                                                                                      |                                                                      |

\* Give such information separately for cases and controls in case-control studies, and if applicable for exposed and unexposed groups in cohort and cross-sectional studies.

|                                | <i>Item #</i> | <i>Cohort study</i>                                                                                                                                                                                           | <i>Case-control study</i>                                                  | <i>Cross-sectional study</i>                          |
|--------------------------------|---------------|---------------------------------------------------------------------------------------------------------------------------------------------------------------------------------------------------------------|----------------------------------------------------------------------------|-------------------------------------------------------|
| <b><i>Funding</i></b>          | 13            | Give source of funding and role of funder(s) for the present study and, if applicable, the original study on which the present article is based.                                                              |                                                                            |                                                       |
| <b><i>RESULTS</i></b>          |               |                                                                                                                                                                                                               |                                                                            |                                                       |
| <b><i>Participants</i></b>     | 14 *          | (a) Report the numbers of individuals at each stage of the study, e.g. numbers potentially eligible, examined for eligibility, confirmed eligible, included in the study, completing follow up, and analysed. |                                                                            |                                                       |
|                                |               | (b) Give reasons for non-participation at each stage.                                                                                                                                                         |                                                                            |                                                       |
|                                |               | (c) A flow diagram is recommended.                                                                                                                                                                            |                                                                            |                                                       |
|                                |               | (d) Report dates defining period of recruitment.                                                                                                                                                              |                                                                            |                                                       |
|                                |               |                                                                                                                                                                                                               | (e) For matched studies, give distribution of number of controls per case. |                                                       |
| <b><i>Descriptive data</i></b> | 15 *          | (a) Give characteristics of study participants (e.g. demographic, clinical, social) and information on exposures and potential confounders                                                                    |                                                                            |                                                       |
|                                |               | (b) Indicate for each variable of interest the completeness of the data.                                                                                                                                      |                                                                            |                                                       |
|                                |               | (c) Summarize average and total amount of follow up and dates defining follow up.                                                                                                                             |                                                                            |                                                       |
| <b><i>Outcome data</i></b>     | 16 *          | Report numbers of outcome events or summary measures over time.                                                                                                                                               | Report numbers in each exposure category.                                  | Report numbers of outcome events or summary measures. |

\* Give such information separately for cases and controls in case-control studies, and if applicable for exposed and unexposed groups in cohort and cross-sectional studies.

|                         | <i>Item #</i> | <i>Cohort study</i>                                                                                                                                                                                                                                                                                                                                                                                                                                                                                                                                                                                                                                       | <i>Case-control study</i> | <i>Cross-sectional study</i> |
|-------------------------|---------------|-----------------------------------------------------------------------------------------------------------------------------------------------------------------------------------------------------------------------------------------------------------------------------------------------------------------------------------------------------------------------------------------------------------------------------------------------------------------------------------------------------------------------------------------------------------------------------------------------------------------------------------------------------------|---------------------------|------------------------------|
| <b>Main results</b>     | 17            | <p>(a) Give unadjusted and confounder adjusted measures of association and their precision (e.g. 95% confidence intervals). Make clear which confounders were adjusted for and on what grounds they were included and others were not.</p> <p>(b) For comparisons using categories derived from quantitative variables, report the range of values or median value in each group.</p> <p>(c) Translate relative measures into absolute differences, for a meaningful risk period that does not extend beyond the range of the data.</p> <p>(d) Report results standardized to confounder and modifier distributions for realistic target populations.</p> |                           |                              |
| <b>Other analyses</b>   | 18            | Report any other analyses performed, e.g. subgroup analyses and sensitivity analyses.                                                                                                                                                                                                                                                                                                                                                                                                                                                                                                                                                                     |                           |                              |
| <b>DISCUSSION</b>       |               |                                                                                                                                                                                                                                                                                                                                                                                                                                                                                                                                                                                                                                                           |                           |                              |
| <b>Key findings</b>     | 19            | Summarize key results with reference to study hypotheses.                                                                                                                                                                                                                                                                                                                                                                                                                                                                                                                                                                                                 |                           |                              |
| <b>Limitations</b>      | 20            | (a) Discuss limitations of the study, taking into account sources of potential bias or imprecision, and problems that could arise from multiplicity of analyses, exposures and outcomes. Discuss both direction and magnitude of any potential bias.                                                                                                                                                                                                                                                                                                                                                                                                      |                           |                              |
|                         |               | (b) Consider that the discussion of limitations should not be used as a substitute for quantitative sensitivity analyses.                                                                                                                                                                                                                                                                                                                                                                                                                                                                                                                                 |                           |                              |
| <b>Generalizability</b> | 21            | Discuss the generalizability (external validity) of the study findings.                                                                                                                                                                                                                                                                                                                                                                                                                                                                                                                                                                                   |                           |                              |
| <b>Interpretation</b>   | 22            | Give a cautious overall interpretation of the results in the context of current evidence and study limitations, paying attention to alternative interpretations.                                                                                                                                                                                                                                                                                                                                                                                                                                                                                          |                           |                              |

\* Give such information separately for cases and controls in case-control studies, and if applicable for exposed and unexposed groups in cohort and cross-sectional studies.
